# Supplementary material for: Mycobacterium tuberculosis Rv3628 isan effective adjuvant via activationof dendritic cells for cancer immunotherapy
Source: PubMed Central journal article supplement — Mol Ther Oncolytics. 2021 Oct 20;23:288–302. doi: 10.1016/j.omto.2021.10.003 (PMC8571481; doi:10.1016/j.omto.2021.10.003), 2021-10-20
Supplement: mmc1.pdf [file mmc1.pdf]

OMTO, Volume 23

**Supplemental information**

***Mycobacterium tuberculosis* Rv3628 is**

**an effective adjuvant via activation**

**of dendritic cells for cancer immunotherapy**

**Juan Wu, Heng Yang, Jin-chuan Xu, Zhidong Hu, Wen-fei Gu, Zhen-yan Chen, Jing-xian Xia, Douglas B. Lowrie, Shui-Hua Lu, and Xiao-Yong Fan**

## Supplementary Figures

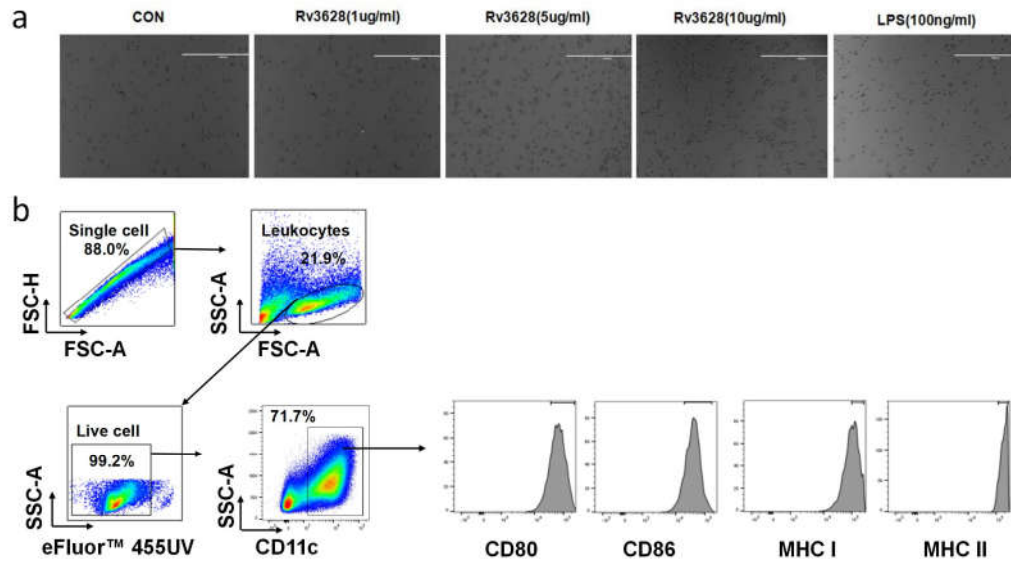

**Figure S1. Morphological changes of BMDCs and flow cytometry analysis of BMDCs after treatment with Rv3628.** BMDCs were treated with 1, 5, 10  $\mu\text{g}/\text{ml}$  Rv3628 or with 100 ng/ml LPS for 24 h. (a) Morphological changes of BMDCs. (b) Representative graphs showing the gating strategy for analysis of BMDCs.

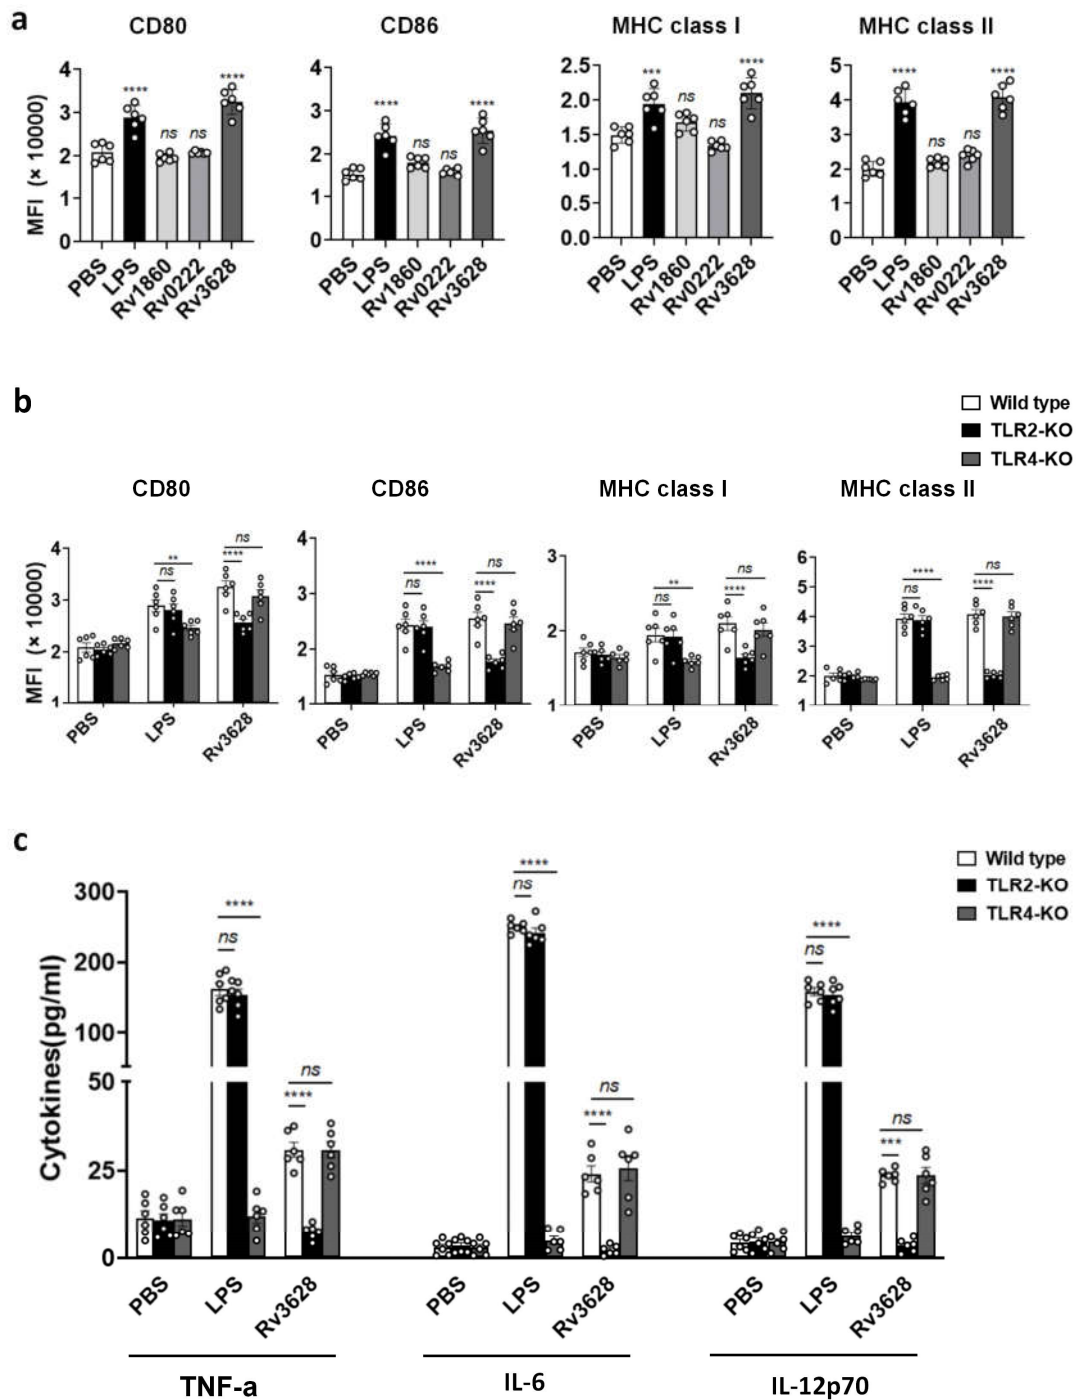

**Figure S2. Rv3628 promotes BMDCs activation by interacting with TLR2.** BMDCs were treated with 10  $\mu\text{g/mL}$  Rv3628, Rv1860, Rv0222 or with 100  $\text{ng/mL}$  LPS for 24 h. **(a)** DCs were stained with anti-CD80, anti-CD86, anti-MHC class I, or anti-MHC class II mAbs and analyzed for the expression of surface markers. The median fluorescence intensity (MFI) of the positive cells is shown. **(b)** and **(c)** DCs derived from WT, TLR2 KO, and TLR4 KO mice were treated with Rv3628 or LPS (100  $\text{ng/mL}$ ) for 24 h. The bar graphs show the regulation of surface molecules and pro-inflammatory cytokines among CD11c<sup>+</sup>-gated Rv3628-treated DCs derived from WT, TLR2 KO, and TLR4 KO mice ( $n = 4$  mice, two-way ANOVA, mean  $\pm$  SEM).

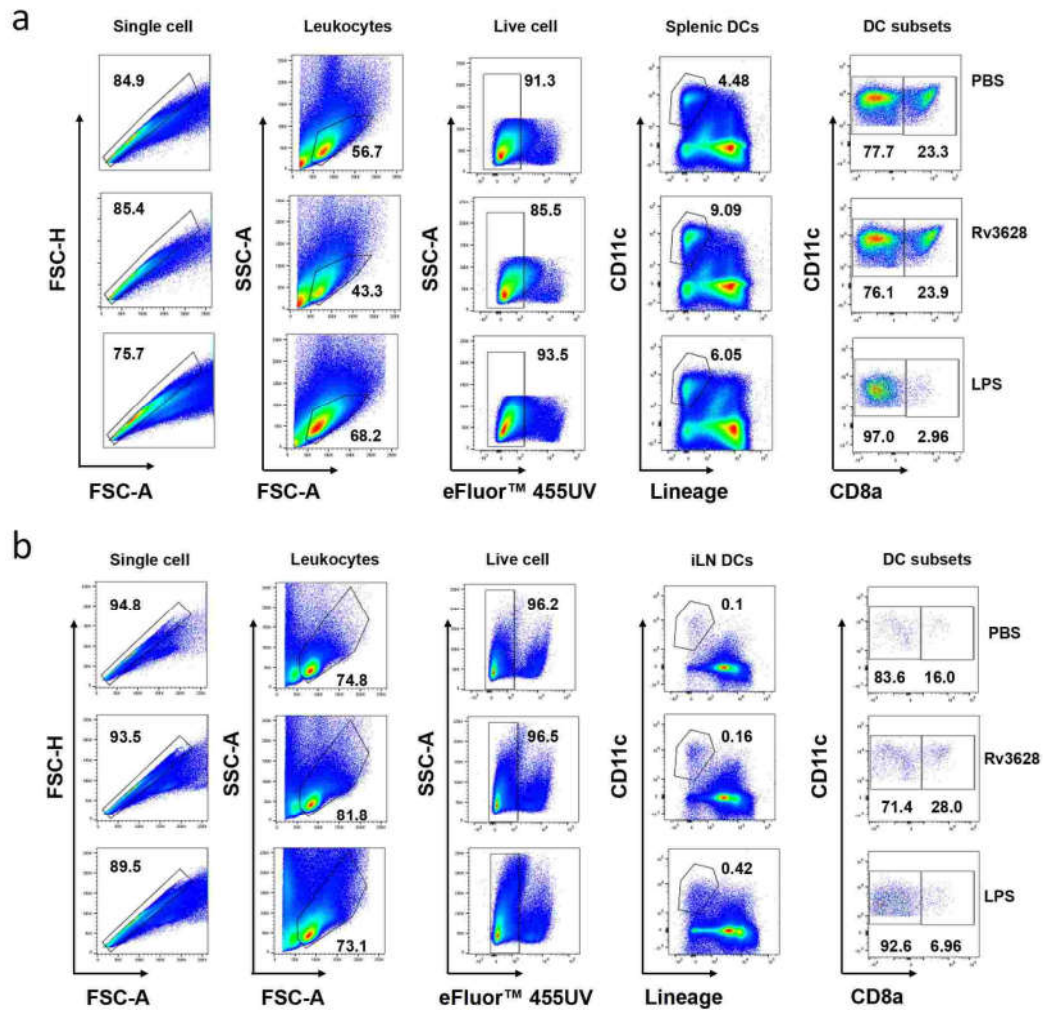

**Figure S3. Definition of DCs from spleen and inguinal lymph node (iLN).** Spleen and iLN were harvested from C57BL/6 mice and the cells were stained with a lineage marker and CD11c. **(a)** The splenic DCs lineage markers included were anti-B220, anti-CD3, anti-CD49b, anti-Gr1, anti-Thy1.1, anti-TER-119. Lin<sup>-</sup> CD11c<sup>+</sup> live leukocytes were defined as pDCs. The pDCs were further divided into CD8α<sup>+</sup> and CD8α<sup>-</sup> DCs. **(b)** The iLN DCs lineage markers included were anti-B220, anti-CD3, anti-CD49b, anti-Gr1, anti-Thy1.1, anti-TER-119. Lin<sup>-</sup> CD11c<sup>+</sup> live leukocytes were defined as iLN DCs. The iLN DCs were further divided into CD8α<sup>+</sup> and CD8α<sup>-</sup> DCs.

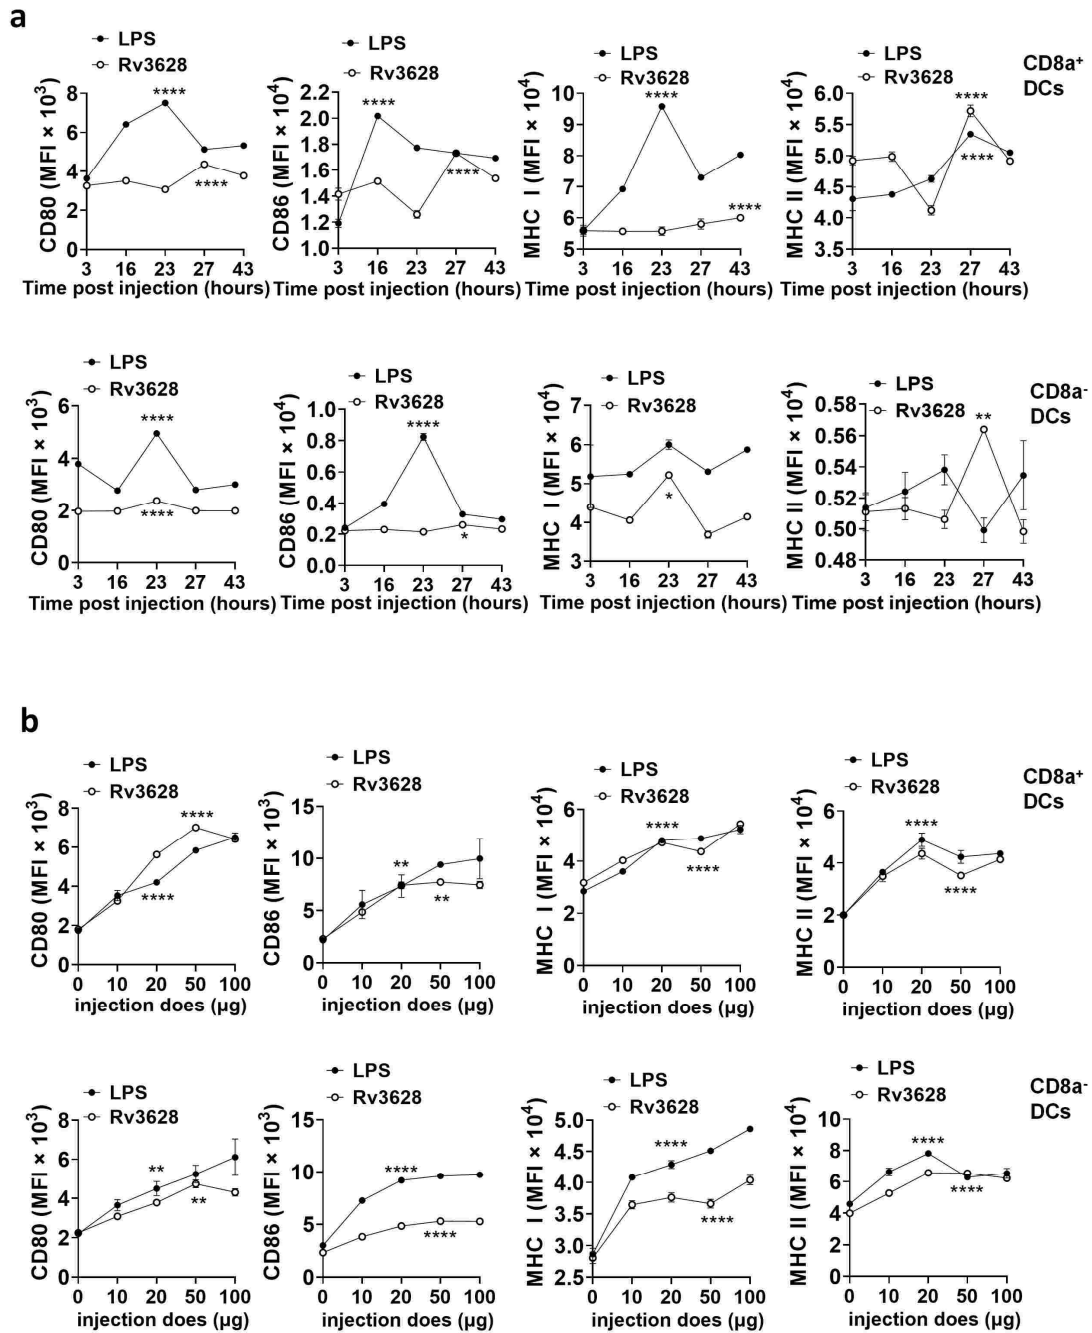

**Figure S4. Dose-dependent and time-dependent effect of Rv3628 on the activation of mouse iLN DCs.** (a) C57BL/6 mice were injected i.v. with the indicated dose of Rv3628 or LPS and after 24 h the iLN were harvested. The expression level of co-stimulatory molecules and MHC classes I and II of CD8 $\alpha$ <sup>+</sup> DCs (upper panel) and CD8 $\alpha$ <sup>-</sup> DCs (lower panel) are shown. ( $n = 3$  mice, two-way ANOVA, mean  $\pm$  SEM). (b) C57BL/6 mice were injected i.v. with 2.5 mg/kg Rv3628 or 1.0 mg/kg LPS and iLN were harvested as indicated by the time points post-injection. The expression level of co-stimulatory molecules and MHC classes I and II in CD8 $\alpha$ <sup>+</sup> DCs (upper panel) and CD8 $\alpha$ <sup>-</sup> DCs (lower panel) are shown. ( $n = 3$  mice,

two-way ANOVA, mean  $\pm$  SEM).

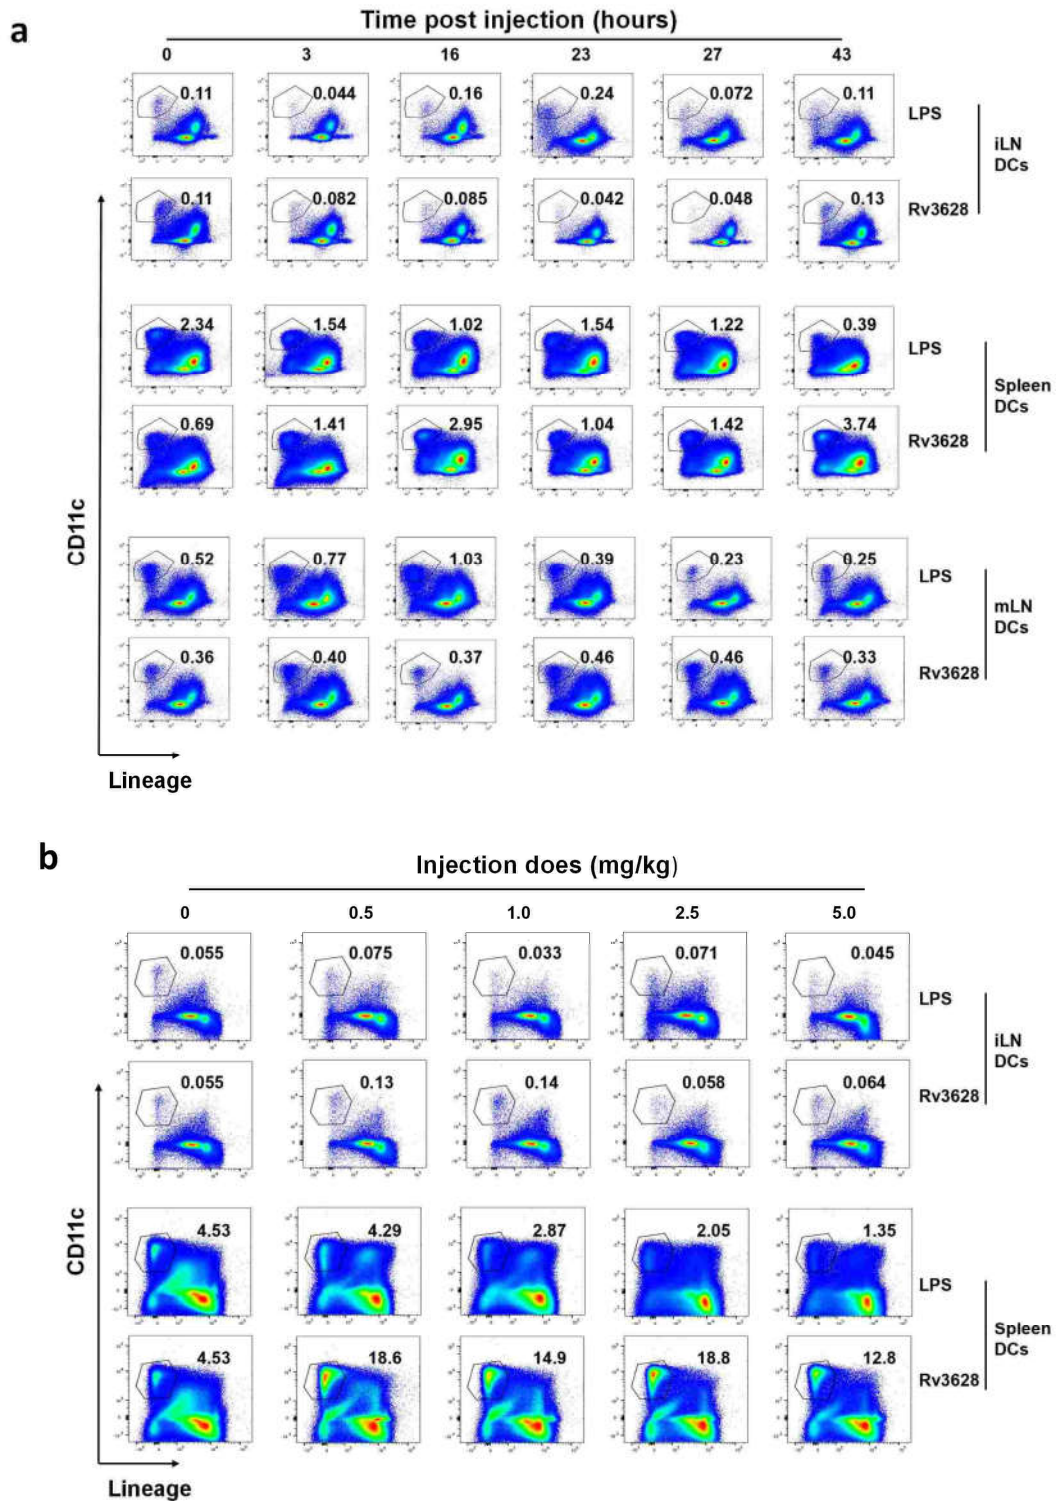

**Figure S5. Flow cytometry analysis of dose-dependent and time-dependent effects of Rv3628 on DCs.** Representative graphs showing the gating strategy and analysis of DCs. (a) C57BL/6 mice were injected *i.v.* with 2.5 mg/kg Rv3628 and 1.0 mg/kg LPS; LN and spleens were harvested at the indicated time points post-injection. (b) C57BL/6 mice were injected *i.v.* with the indicated dose of Rv3628 or LPS and 24

h later the iLN, spleen, mLN were harvested.

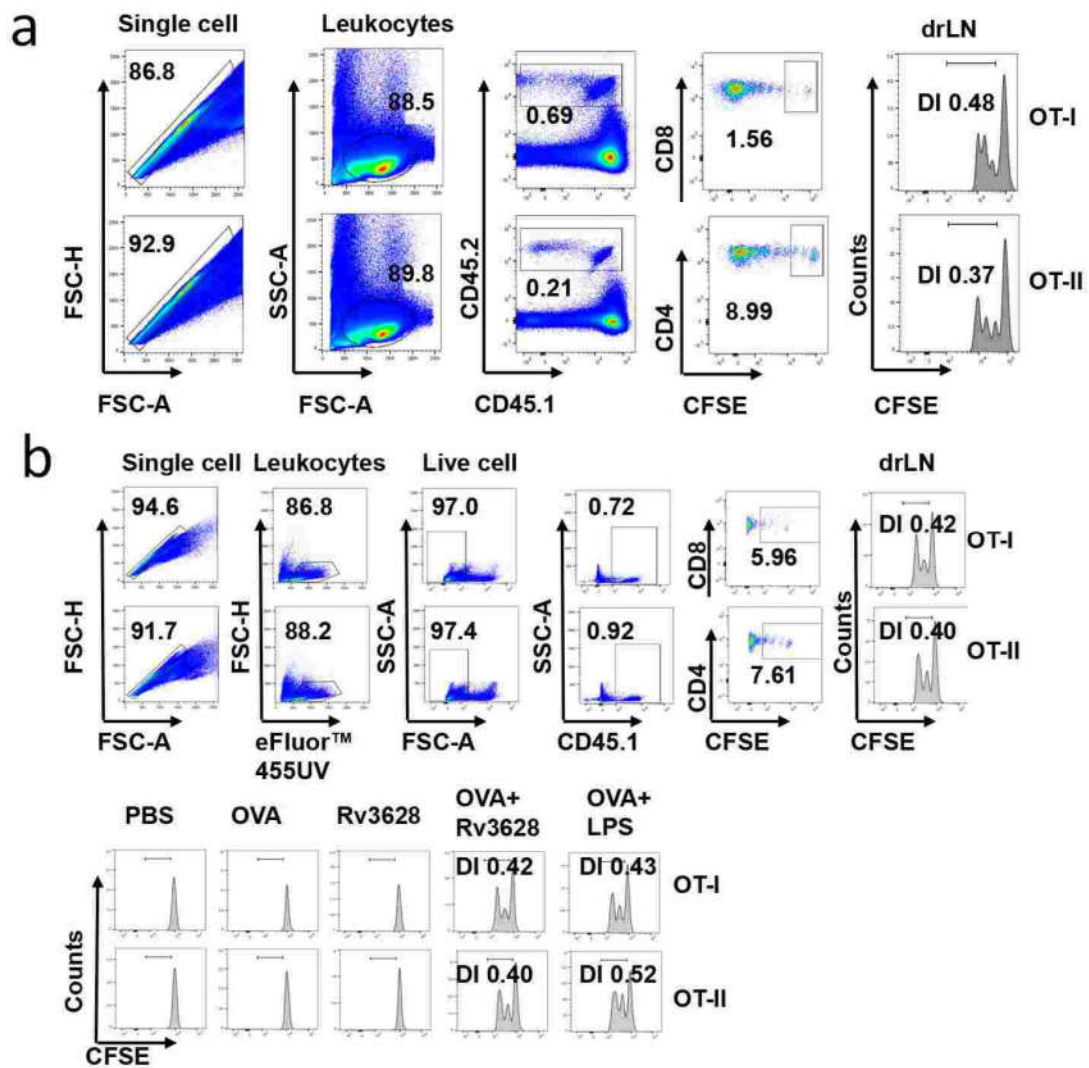

**Figure S6. Flow cytometry analysis of OT-I and OT-II cells in iLN. (a)** The analysis strategy of flow cytometry for detection of CD45.2-expressing OT-I and OT-II cells in iLN from CD45.1 congenic mice and **(b)** from CD45.2 congenic mice.

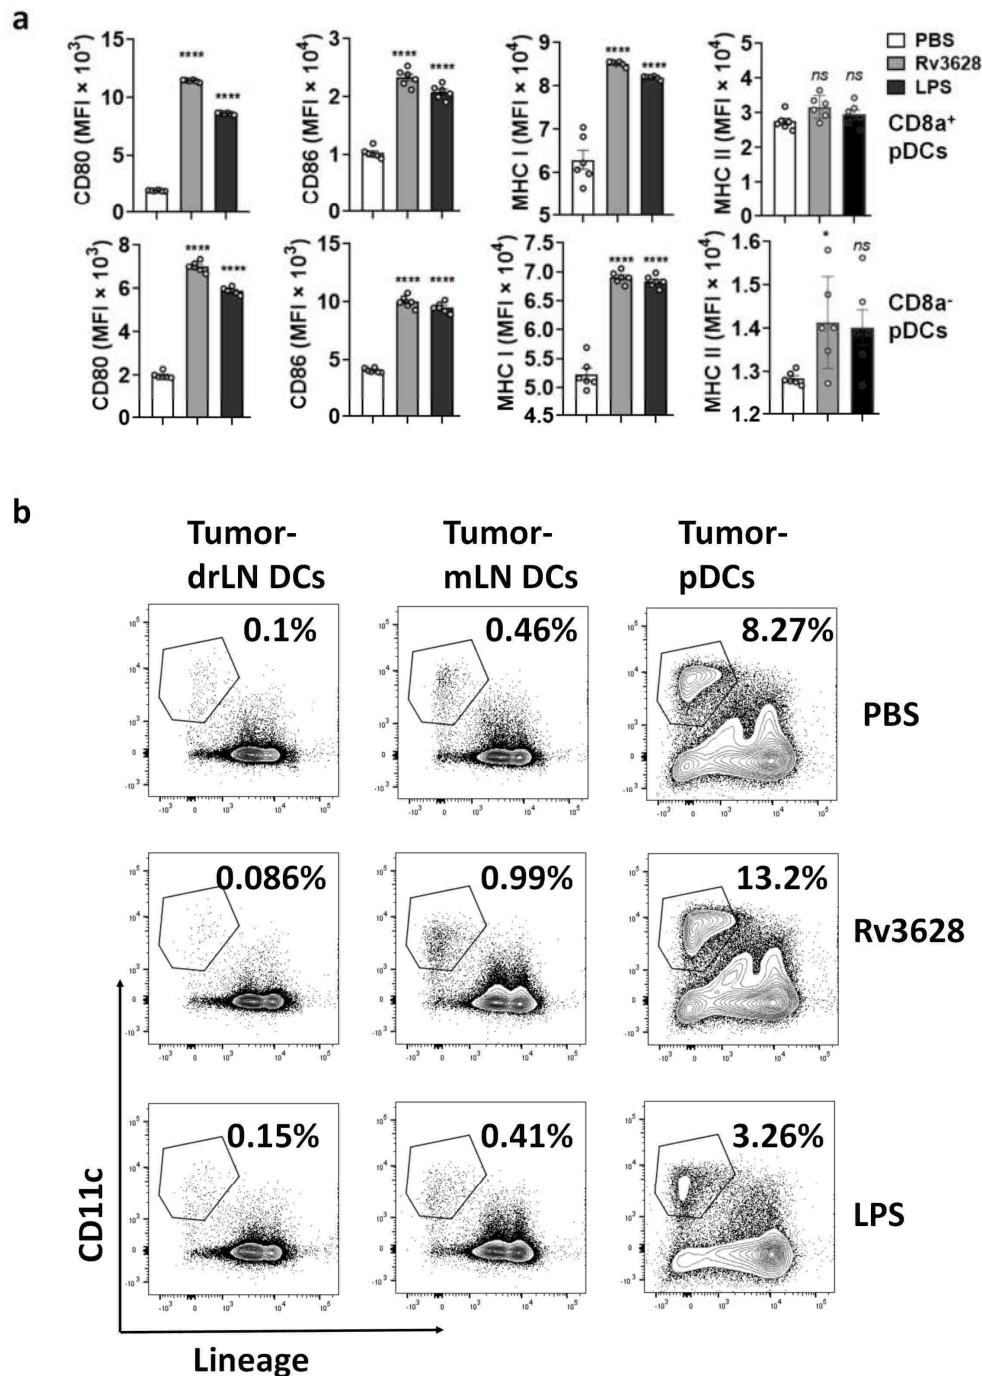

**Figure S7. Rv3628-promoted pDC maturation in the tumor microenvironment and characterization of the DCs.** C57BL/6 mice were injected *s.c.* with  $1 \times 10^6$  B16 melanoma cells. Fifteen days after tumor injection, the mice were treated with PBS, 2.5 mg/kg Rv3628 or 1.0 mg/kg LPS for 24 h, and then the spleens were harvested. **(a)** The expression levels of co-stimulatory molecules and MHC classes I and II in CD8 $\alpha^+$  pDCs (upper panel) and CD8 $\alpha^-$  pDCs (lower panel) are shown ( $n = 6$  mice, one-way ANOVA, mean  $\pm$  SEM). **(b)** Tumor drLN, mLN, spleens were harvested from C57BL/6 and the cells were stained as shown in supplemental Fig.S2. Lin<sup>-</sup>CD11c<sup>+</sup> live leukocytes were defined as DCs.



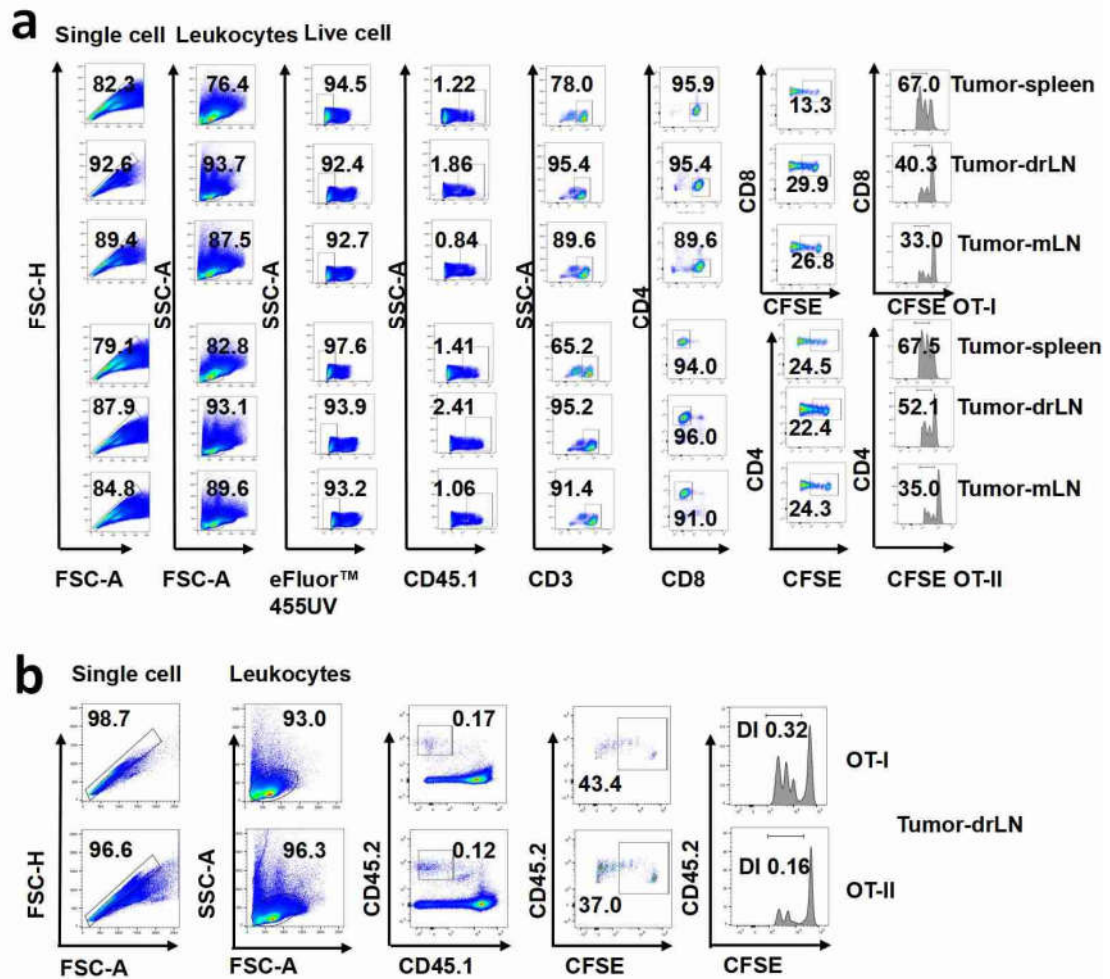

**Figure S8. Flow cytometry analysis of OT-I and OT-II cells in mLN and tumor drLN.** (a) The analysis strategy of flow cytometry for detection of CD45.1-expressing OT-I and OT-II cells in CD45.2 congenic mice. (b) Analysis strategy of flow cytometry for detection of CD45.2-expressing OT-I and OT-II cells in CD45.1 congenic mice.

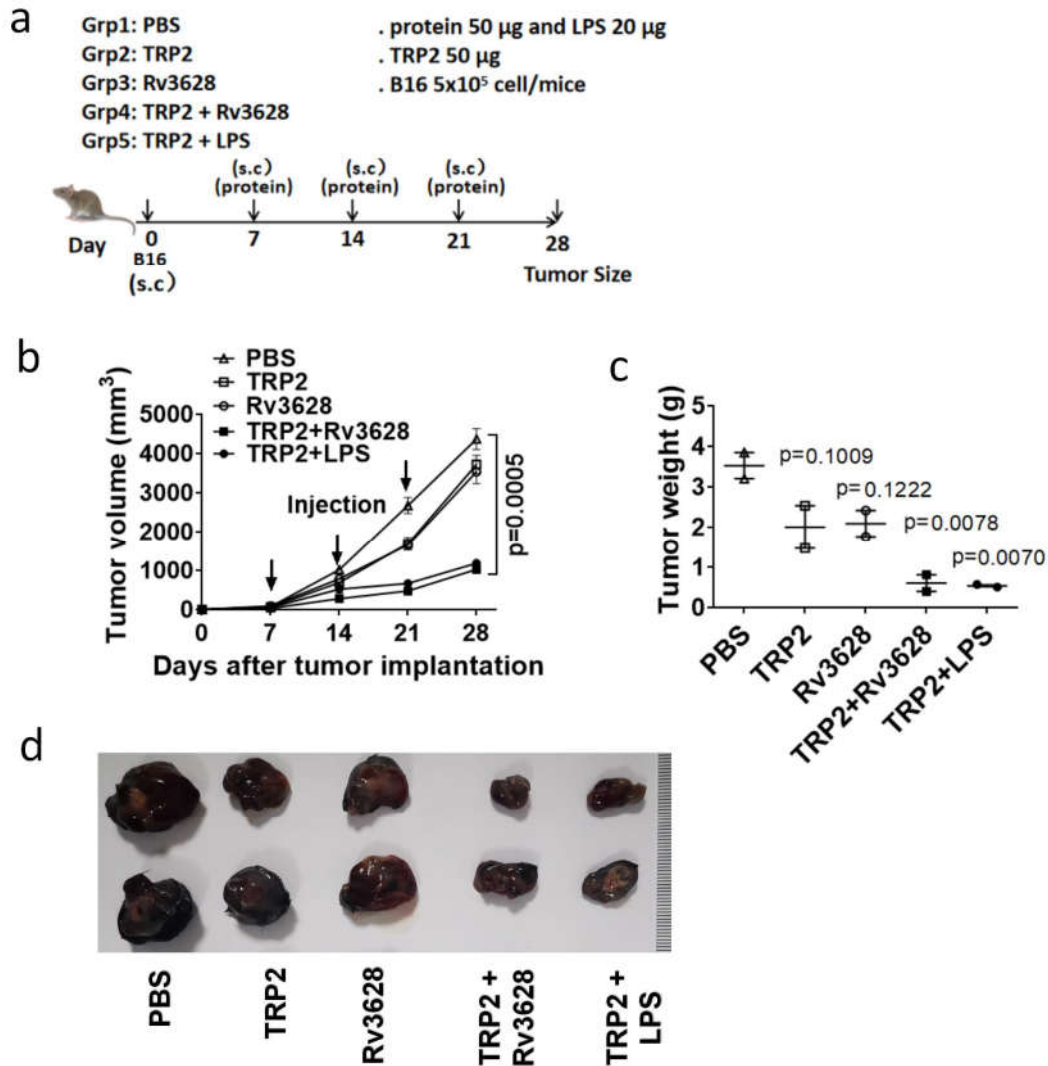

**Figure S9. Rv3628 promotes tumor antigen-specific immune activation and immunity against tumor self-Ag TRP2.** C57BL/6 mice were injected *s.c.* with  $5 \times 10^5$  B16F10 tumor cells. After 7, 14 and 21 days the mice were treated with PBS or 1.0 mg/kg TRP2, 2.5 mg/kg Rv3628. **(a)** The treatment schedule. **(b)** The curves of B16 tumor growth in mice are shown. ( $n = 2$  mice, two-tailed P value, unpaired t-test, means  $\pm$  SEM). **(c)** The weights of the tumor masses on day 28 after B16 tumor cell injection. ( $n = 2$  mice, one-way ANOVA, mean  $\pm$  SEM). **(d)** The size of the tumor masses on day 28 after B16 tumor cell injection. ( $n = 2$  mice).

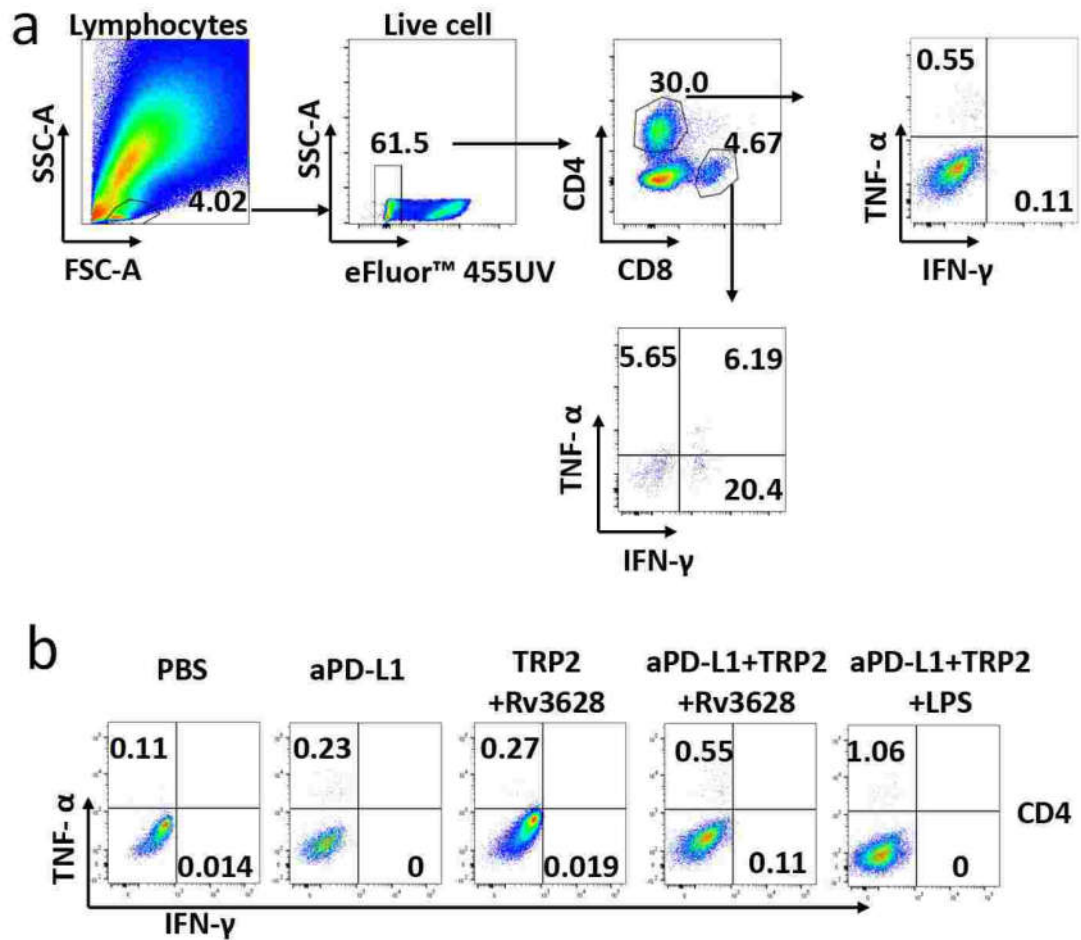

**Figure S10. Gating strategy for tumor-infiltrated CTLs present after combination treatment with Rv3628 and anti-PD-L1 antibodies.** CTLs in B16 tumors were analyzed by flow cytometry. The strategy of flow cytometry analysis for CTLs in B16 tumors is shown.
